# Supplementary material for: The synthesis of green fluorescent carbon dots for warm white LEDs
Source: Royal Society of Chemistry journal article supplement (doi:10.1039/c8ra02226g), 2018-01-01
Supplement: c8ra02226g1.pdf [file c8ra02226g1.pdf]

## Electronic Supplementary Information

### The Synthesis of Green Fluorescent Carbon Dots for Warm White LEDs

Du Qin <sup>a,b</sup>, Zheng Jingxia <sup>a,c</sup>, Wang Junli <sup>a,c</sup>, Yang Yongzhen<sup>\*, a,c</sup>,  
Liu Xuguang<sup>\*, a,d</sup>

<sup>a</sup>Key Laboratory of Interface Science and Engineering in Advanced Materials  
(Taiyuan University of Technology), Ministry of Education,  
Taiyuan 030024, China

<sup>b</sup>College of Chemistry and Chemical Engineering, Taiyuan University  
of Technology, Taiyuan 030024, China

<sup>c</sup>Research Center of Advanced Materials Science and Technology, Taiyuan  
University of Technology, Taiyuan 030024, China

<sup>d</sup>College of Advanced Materials Science and Engineering, Taiyuan  
University of Technology, Taiyuan 030024, China

\*Corresponding authors: Email: liuxuguang@tyut.edu.cn (Liu Xuguang),  
yyztyut@126.com (Yang Yongzhen).

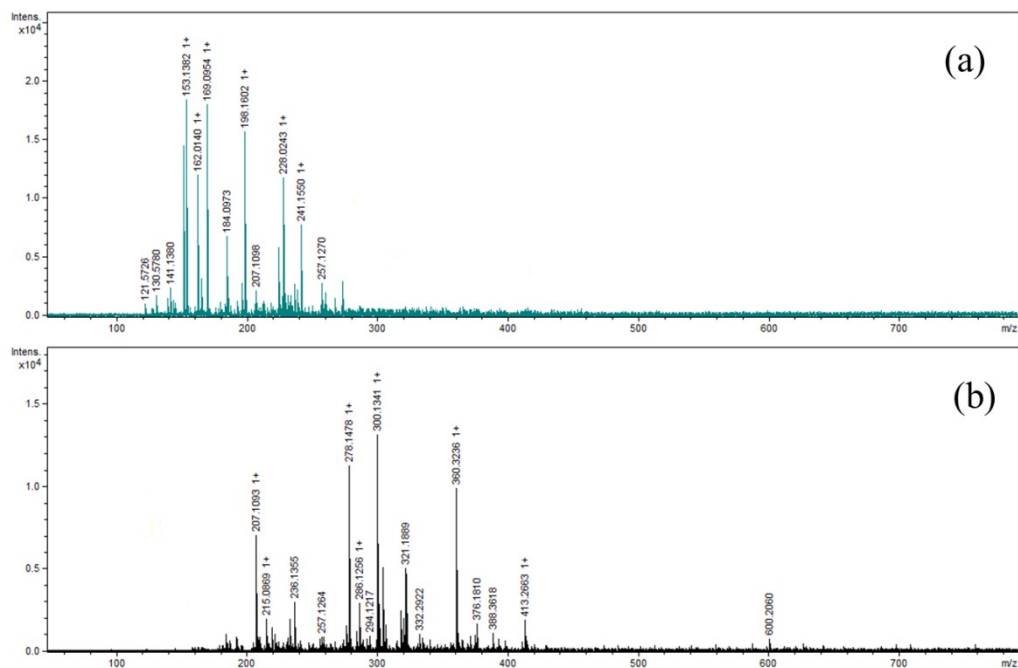

Figure S1 ESI-MS spectra of CDs-b (a) and CDs-s (b) in the region of 0–800 m/z.

Table S1 Elemental composition of CDs-o, CDs-s, CDs-b, CDs-w and CDs-e

|       | C     | H     | N     | O*    |
|-------|-------|-------|-------|-------|
|       | (wt%) | (wt%) | (wt%) | (wt%) |
| CDs-o | 52.80 | 5.44  | 7.76  | 34.00 |
| CDs-s | 55.00 | 5.60  | 6.67  | 32.73 |
| CDs-b | 53.24 | 5.63  | 7.08  | 34.05 |
| CDs-w | 55.51 | 4.97  | 0     | 39.52 |
| CDs-e | 56.52 | 5.08  | 0     | 38.40 |

\*By difference.

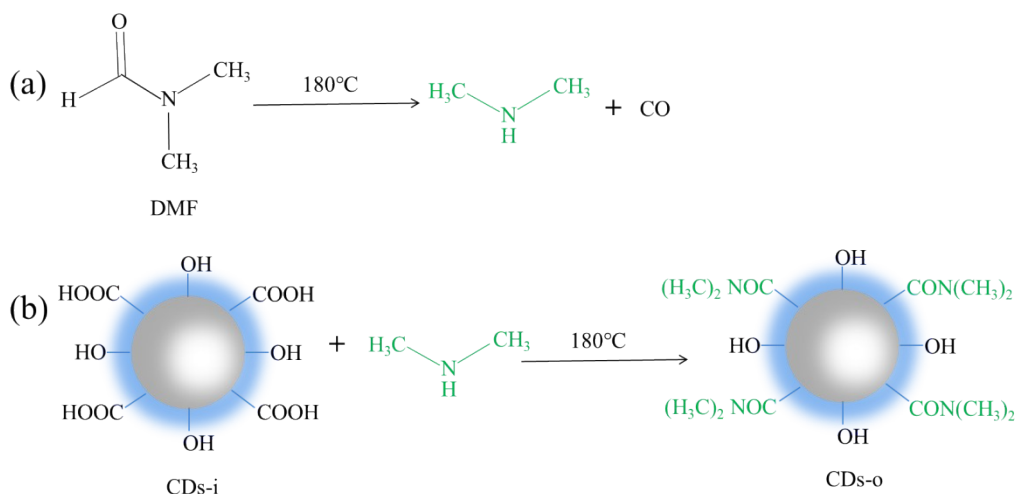

Figure S2 (a) Decomposition of DMF at high temperature. (b) Schematic illustration of the strategy for preparation of CDs-o.

Table S2 The QY of blue emissive CDs prepared by our group

| materials                     | solvent | emission peak (nm) | approach            | QY     | references |
|-------------------------------|---------|--------------------|---------------------|--------|------------|
| citric acid, KH-792           | water   | 448                | Hydrothermal method | 57.3%  | [1]        |
| citric acid, ethylenediamine  | water   | 444                | Hydrothermal method | 67.06% | [2]        |
| citric acid, ammonia solution | water   | 440                | Hydrothermal method | 35.4%  | [3]        |
| citric acid, L-cysteine       | water   | 420                | Hydrothermal method | 67.41% | [4]        |
| ammonium citrate, phosphates  | water   | 450                | Hydrothermal method | 62%    | [5]        |

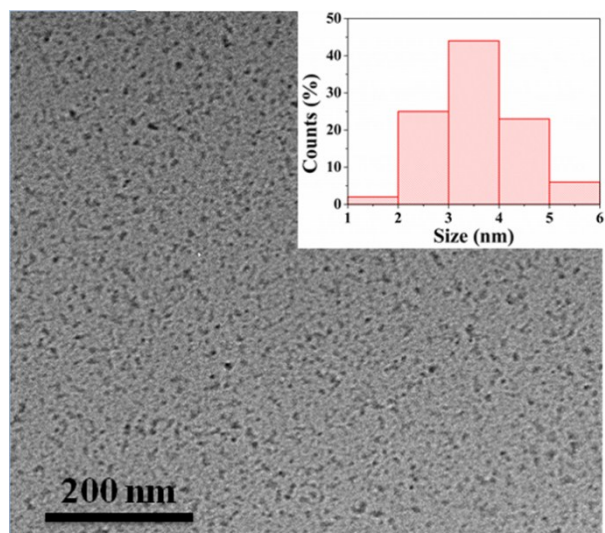

Figure S3 TEM images of CDs-w (inset is the size distribution).

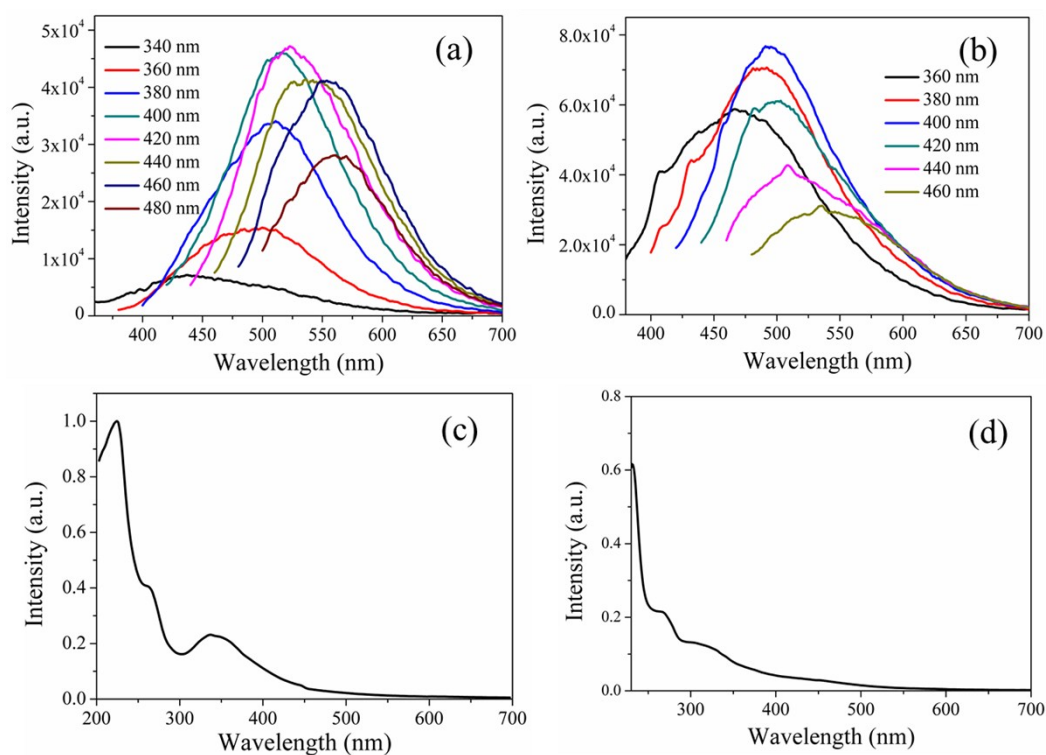

Figure S4 UV-vis absorption spectra, PL spectra at different excitation wavelengths of CDs-we (a, c) and CDs-ee (b, d).

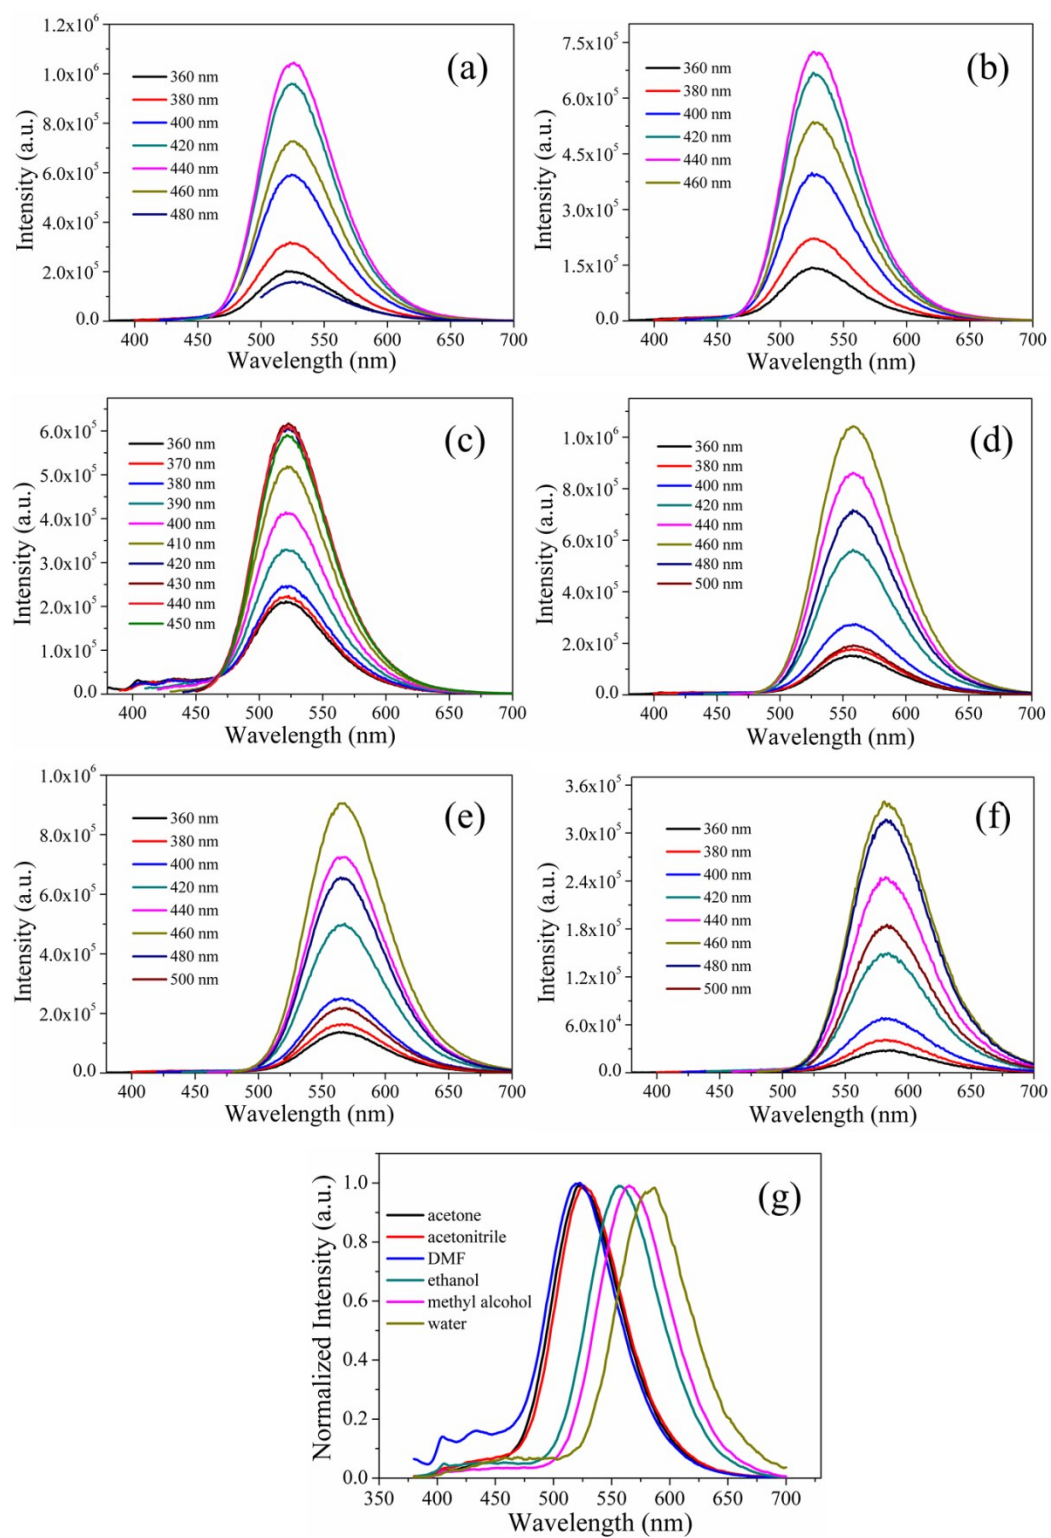

Figure S5 The photoluminescence spectra of CDs-o excited by different excitation wavelengths in solvents of acetone (a), acetonitrile (b), DMF (c), ethanol (d), methyl alcohol (e), water (f), and the photoluminescence spectra of the same CDs in 6 solvents excited by 360 nm light (g).

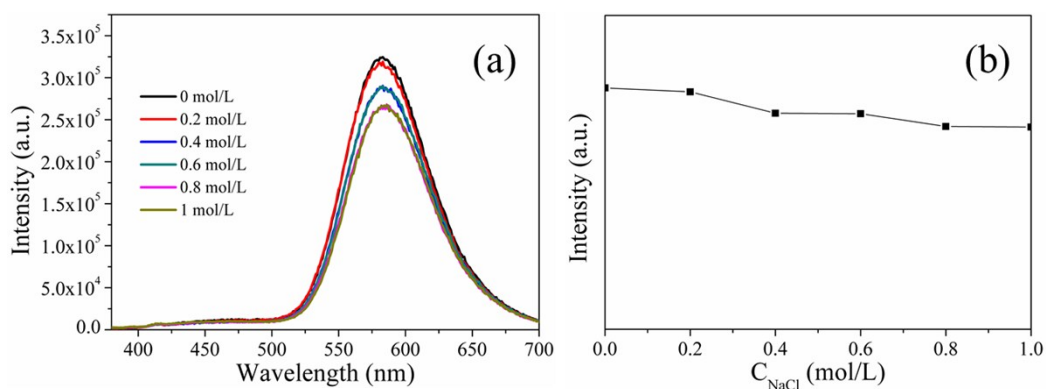

Figure S6 The photoluminescence spectra of CDs-o aqueous solutions (a) and PL intensity (b) (regulated by concentrations of NaCl from 0 to 1 mol/L).

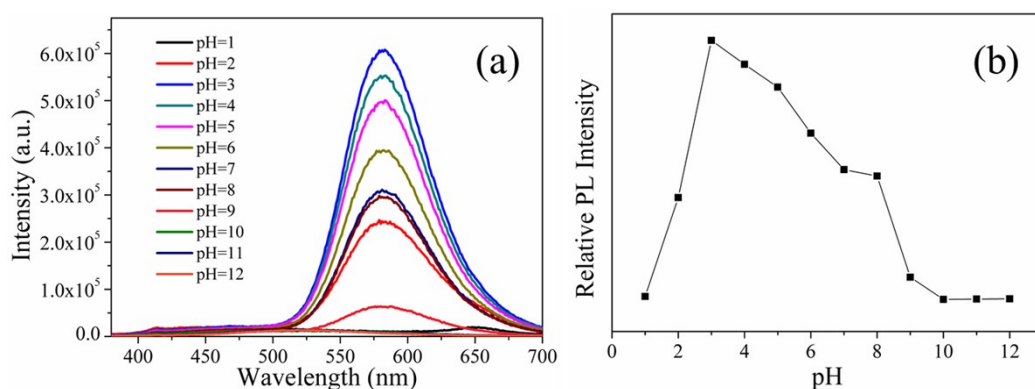

Figure S7 The photoluminescence spectra (a) and relative PL intensity of CDs-o aqueous solution with the increase of pH from 1 to 12.

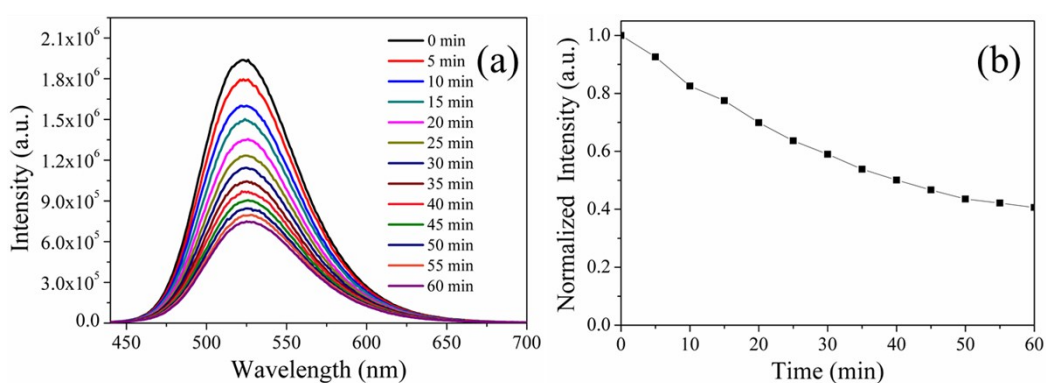

Figure S8 Photoluminescence spectra (a) and variation of PL intensity (b) of CDs-o under UV light during different irradiation time.

## References

- [1] F. Zhang, X. T. Feng, Y. Zhang, L. P. Yan, Y. Z. Yang and X. G. Liu. *Nanoscale*, 2016, **8**, 8618–8632.

- [2] Y. L. Wang, Y. Q. Zhao, Y. Zhang, F. Zhang, X. T. Feng, L. Chen, Y. Z. Yang and X. G. Liu. *RSC Advances*, 2016, **6**, 38761–38768.
- [3] Y. Zhang, P. P. Cui, F. Zhang, X. T. Feng, Y. L. Wang, Y. Z. Yang and X. G. Liu. *Talanta*, 2016, **152**, 288–300.
- [4] Y. L. Wang, Y. Q. Zhao, F. Zhang, L. Chen, Y. Z. Yang and X. G. Liu. *New Journal of Chemistry*, 2016, **40**, 8710–8716.
- [5] F. Zhang, Y. L. Wang, Y. Q. Miao, Y. H. He, Y. Z. Yang and X. G. Liu. *Applied Physics Letters*, 2016, **109**, 083103–083107.
